# Supplementary material
Source: PubMed Central journal article supplement (PMC4135694)
Supplement: JB.01876-14_zjb999093278so1.pdf [file JB.01876-14_zjb999093278so1.pdf]

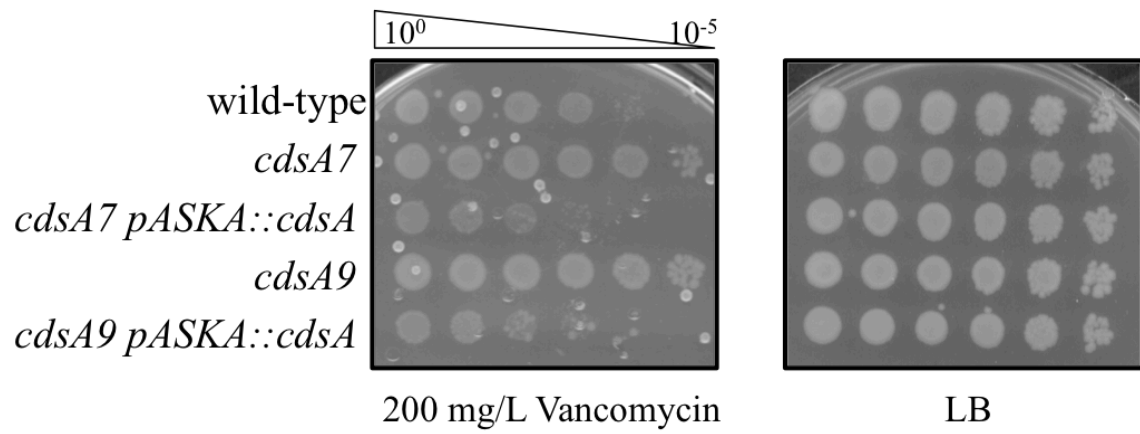

**Fig. S1:** *cdsA* mutants are recessive to wild-type. EOPs of strains supplemented with 200 mg/l vancomycin. IPTG was not supplemented in media to avoid overexpression of *cdsA*.

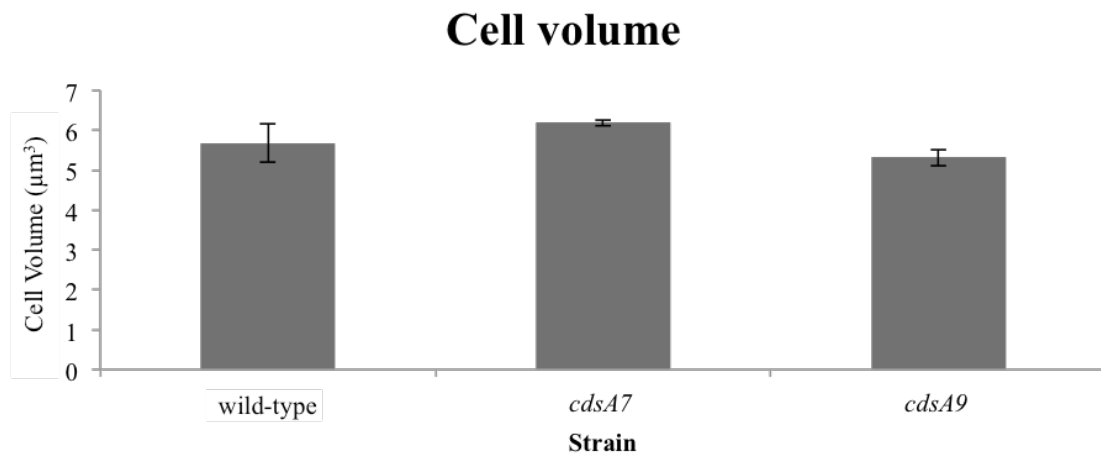

**Fig. S2:** *cdsA* mutant cell size does not differ from wild-type. Cell dimensions were quantified with MicrobeTracker version 0.936 (21), using MATLAB version R2013a. Error bars represent the standard error of the mean ( $n = 3$  replicates of approximately 100 cells each). *P*-values were calculated using a Student's *t*-test. All *p*-values were  $> 0.05$ .

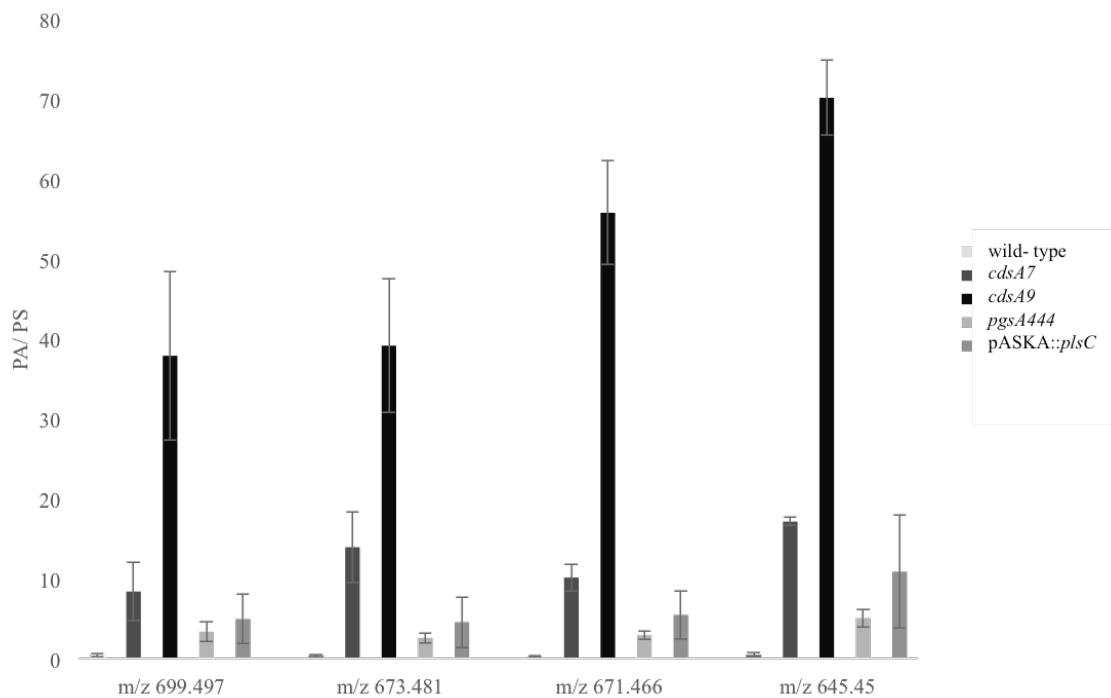

**Fig. S3:** All PA species detected accumulate in the *cdsA* strains, the *pgsA444* strain, and the *plsC* overexpression strain. PA and PS were quantified by Q-TOF LC/MS. Each PA species (PA (36:2) m/z 699, PA (34:1) m/z 673, PA (34:2) m/z 671, PA (32:1) m/z 645) was normalized to sum of all PS species. The change of PA/PS is reported  $\pm$  standard error from three experiments.

# Reverse-Phase LC-MS EIC plot

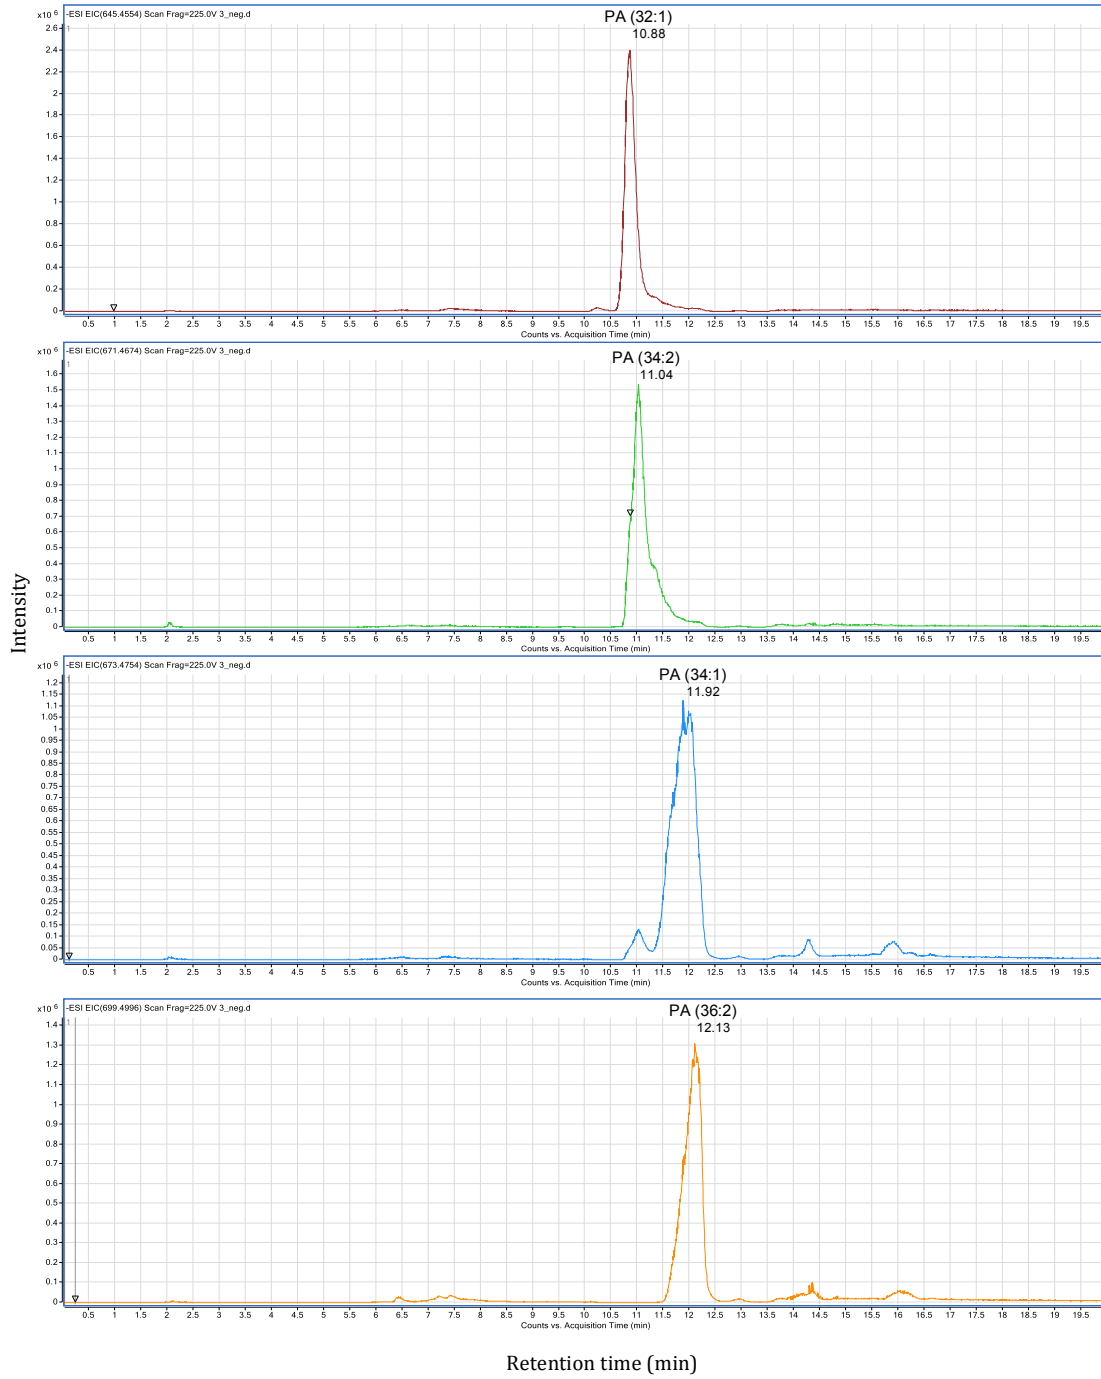

## ESI-MS [M-H]<sup>-</sup>

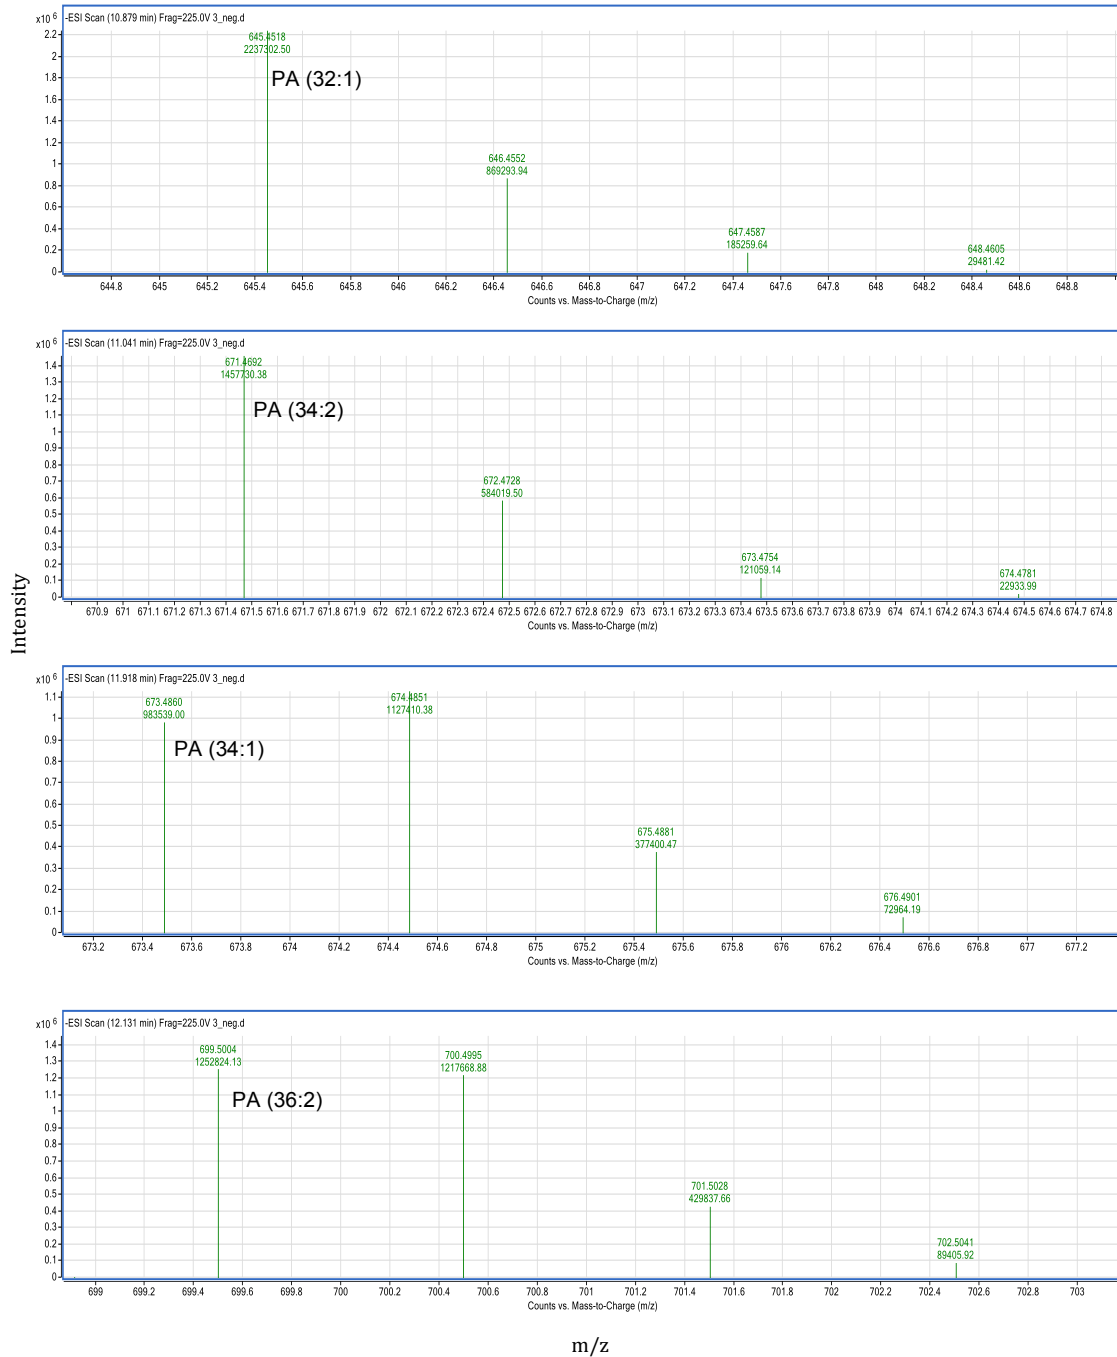

**Figure S4:** Retention time and ESI-MS of each PA species. PA (32:1) m/z 645, PA (34:2) m/z 671, PA (34:1) m/z 673, PA (36:2) m/z 699 accumulated in *cdsA9* strain, which was used as a representative example.

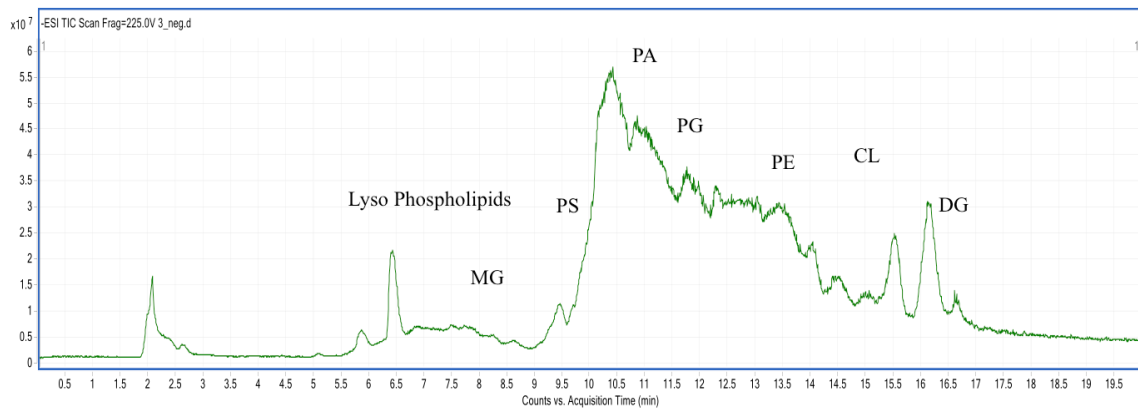

**Fig. S5:** ESI (Electrospray ionization)-TIC (total ion current) chromatogram from reverse-phase LC-MS analysis of phosphatidic acid (PA) and cardiolipin (CL). This chromatogram is from a *cdsA9* strain, which was used as a representative example. Monoglyceride (MG), Phosphatidylserine (PS), Phosphatidylglycerol (PG), Phosphatidylethanolamine (PE), Diglyceride (DG) are also shown on the chromatogram.

| <b>Strain</b>       | <b>growth rate (<math>\mu</math>) <math>\pm</math> SEM</b> |
|---------------------|------------------------------------------------------------|
| <b>wild-type</b>    | <b>3.1 <math>\pm</math> 0.2</b>                            |
| <b><i>cdsA7</i></b> | <b>3.3 <math>\pm</math> 0.1</b>                            |
| <b><i>cdsA9</i></b> | <b>3.0 <math>\pm</math> 0.2</b>                            |

**Table S1:** *cdsA* mutant growth rate does not differ from wild-type. Strains were subcultured and OD<sub>600nm</sub> readings were taken every 20 minutes. OD<sub>600nm</sub> was plotted against time on a logarithmic scale. Linear regression analysis was used to determine a growth rate ( $\mu$ ) for each strain. The growth rate is reported  $\pm$  standard error of the mean from three technical replicates for three biological replicates per strain.
